# Supplementary material
Source: PubMed Central journal article supplement (PMC7853234)
Supplement: jcsm.8810.ds001.pdf [file jcsm.8810.ds001.pdf]

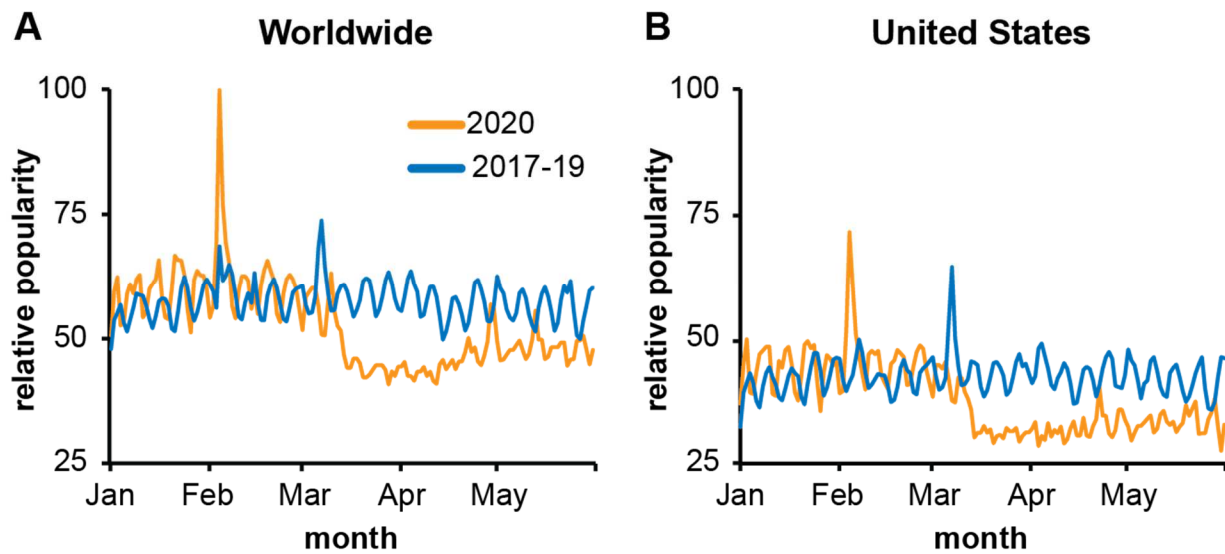

Figure S1. Daily search queries for the search term *cancer* worldwide (panel A) and in the United States (panel B) during the first five months (January through May 2020) of the COVID-19 pandemic. The peak in the number of searches for cancer is likely due to World Cancer Day on February 4. There is a sudden drop in cancer searches in March 2020 compared to 2017-2019 around the time countries started implementing emergency measures in response to the COVID-19 pandemic, and which persists throughout the acute phase of the pandemic, suggestive of a change in people's information seeking behaviors and a shift towards reduced Google searches for health conditions not considered directly related to the ongoing pandemic.

Table S1. Absolute number and peak time of search queries for *insomnia* in 2017-2020 in the United States.

| State | 2017-2019                             |                                       |                                       |                                      |                                      | 2020                        |                             |
|-------|---------------------------------------|---------------------------------------|---------------------------------------|--------------------------------------|--------------------------------------|-----------------------------|-----------------------------|
|       | Avg number of queries /year (Jan-May) | Avg number of queries /year (Jan-Dec) | Avg number of queries /year (Jan-May) | Avg number of queries/year (Jan-Dec) | Peak time of queries (circular mean) | Number of queries (Jan-May) | Number of queries (Jan-May) |
|       |                                       |                                       | per 1000 people                       |                                      |                                      |                             | per 1000 people             |
| All   | 1,710,967                             | 4,256,903                             | 5                                     | 13                                   | 3:08 AM                              | 2,685,590                   | 8                           |
| AK    | 2,860                                 | 7,350                                 | 4                                     | 10                                   | 3:22 AM                              | 4,200                       | 6                           |
| AL    | 22,867                                | 58,933                                | 5                                     | 12                                   | 2:47 AM                              | 37,500                      | 8                           |
| AR    | 11,667                                | 28,633                                | 4                                     | 10                                   | 3:16 AM                              | 18,100                      | 6                           |
| AZ    | 35,300                                | 89,500                                | 5                                     | 12                                   | 3:08 AM                              | 56,600                      | 8                           |
| CA    | 233,167                               | 589,667                               | 6                                     | 15                                   | 3:29 AM                              | 395,500                     | 10                          |
| CO    | 26,133                                | 64,733                                | 5                                     | 11                                   | 3:04 AM                              | 40,800                      | 7                           |
| CT    | 21,000                                | 51,033                                | 6                                     | 14                                   | 2:55 AM                              | 30,900                      | 9                           |
| DE    | 5,320                                 | 13,140                                | 6                                     | 14                                   | 2:55 AM                              | 7,700                       | 8                           |
| FL    | 108,800                               | 275,167                               | 5                                     | 13                                   | 3:35 AM                              | 174,300                     | 8                           |
| GA    | 61,000                                | 153,433                               | 6                                     | 15                                   | 3:21 AM                              | 95,400                      | 9                           |
| HI    | 7,400                                 | 18,600                                | 5                                     | 13                                   | 2:58 AM                              | 11,500                      | 8                           |
| IA    | 12,500                                | 30,633                                | 4                                     | 10                                   | 2:55 AM                              | 18,100                      | 6                           |
| ID    | 6,100                                 | 14,900                                | 3                                     | 8                                    | 3:32 AM                              | 9,700                       | 5                           |
| IL    | 73,700                                | 179,200                               | 6                                     | 14                                   | 3:01 AM                              | 111,800                     | 9                           |
| IN    | 30,433                                | 75,833                                | 5                                     | 11                                   | 3:18 AM                              | 45,900                      | 7                           |
| KS    | 12,167                                | 29,967                                | 4                                     | 10                                   | 2:55 AM                              | 18,100                      | 6                           |
| KY    | 19,200                                | 47,400                                | 4                                     | 11                                   | 3:14 AM                              | 28,200                      | 6                           |
| LA    | 21,333                                | 54,800                                | 5                                     | 12                                   | 3:03 AM                              | 33,300                      | 7                           |
| MA    | 38,600                                | 93,600                                | 6                                     | 14                                   | 3:08 AM                              | 56,600                      | 8                           |
| MD    | 37,700                                | 93,300                                | 6                                     | 15                                   | 3:15 AM                              | 61,500                      | 10                          |
| ME    | 4,387                                 | 10,720                                | 3                                     | 8                                    | 2:56 AM                              | 6,800                       | 5                           |
| MI    | 50,933                                | 125,633                               | 5                                     | 13                                   | 3:13 AM                              | 74,600                      | 7                           |
| MN    | 26,800                                | 66,400                                | 5                                     | 12                                   | 3:05 AM                              | 40,800                      | 7                           |
| MO    | 27,933                                | 69,067                                | 5                                     | 11                                   | 2:37 AM                              | 40,800                      | 7                           |
| MS    | 14,700                                | 36,767                                | 5                                     | 12                                   | 2:27 AM                              | 22,200                      | 7                           |
| MT    | 3,313                                 | 8,027                                 | 3                                     | 8                                    | 3:14 AM                              | 4,640                       | 4                           |
| NC    | 57,000                                | 144,167                               | 5                                     | 14                                   | 2:56 AM                              | 84,700                      | 8                           |
| ND    | 3,367                                 | 7,910                                 | 4                                     | 10                                   | 2:58 AM                              | 4,520                       | 6                           |
| NE    | 8,100                                 | 19,600                                | 4                                     | 10                                   | 3:24 AM                              | 12,000                      | 6                           |
| NH    | 4,760                                 | 11,920                                | 4                                     | 9                                    | 3:07 AM                              | 7,400                       | 5                           |
| NJ    | 49,300                                | 119,400                               | 6                                     | 13                                   | 3:24 AM                              | 82,000                      | 9                           |
| NM    | 9,067                                 | 22,233                                | 4                                     | 11                                   | 3:05 AM                              | 14,700                      | 7                           |
| NV    | 17,100                                | 44,900                                | 6                                     | 15                                   | 3:14 AM                              | 28,400                      | 9                           |
| NY    | 124,967                               | 304,233                               | 6                                     | 16                                   | 3:18 AM                              | 189,300                     | 10                          |
| OH    | 58,767                                | 142,667                               | 5                                     | 12                                   | 2:57 AM                              | 88,000                      | 8                           |
| OK    | 17,600                                | 44,000                                | 4                                     | 11                                   | 3:04 AM                              | 27,200                      | 7                           |
| OR    | 20,733                                | 50,733                                | 5                                     | 12                                   | 3:21 AM                              | 30,600                      | 7                           |
| PA    | 68,067                                | 165,933                               | 5                                     | 13                                   | 3:01 AM                              | 102,800                     | 8                           |
| RI    | 5,380                                 | 13,860                                | 5                                     | 13                                   | 2:39 AM                              | 8,900                       | 8                           |
| SC    | 22,667                                | 58,000                                | 4                                     | 11                                   | 3:18 AM                              | 34,500                      | 7                           |
| SD    | 3,223                                 | 7,633                                 | 4                                     | 9                                    | 3:28 AM                              | 4,520                       | 5                           |
| TN    | 31,200                                | 77,400                                | 5                                     | 11                                   | 3:51 AM                              | 47,700                      | 7                           |

| State | 2017-2019                             |                                       |                                       |                                      |                                      | 2020                        |                             |
|-------|---------------------------------------|---------------------------------------|---------------------------------------|--------------------------------------|--------------------------------------|-----------------------------|-----------------------------|
|       | Avg number of queries /year (Jan-May) | Avg number of queries /year (Jan-Dec) | Avg number of queries /year (Jan-May) | Avg number of queries/year (Jan-Dec) | Peak time of queries (circular mean) | Number of queries (Jan-May) | Number of queries (Jan-May) |
|       |                                       |                                       | per 1000 people                       |                                      |                                      |                             | per 1000 people             |
| TX    | 160,433                               | 406,867                               | 6                                     | 14                                   | 3:26 AM                              | 263,000                     | 9                           |
| UT    | 13,967                                | 34,433                                | 4                                     | 11                                   | 3:32 AM                              | 22,200                      | 7                           |
| VA    | 47,833                                | 118,400                               | 6                                     | 14                                   | 3:04 AM                              | 77,900                      | 9                           |
| VT    | 2,037                                 | 4,960                                 | 3                                     | 8                                    | 3:04 AM                              | 3,100                       | 5                           |
| WA    | 36,800                                | 89,500                                | 5                                     | 12                                   | 3:24 AM                              | 56,100                      | 7                           |
| WI    | 24,467                                | 60,200                                | 4                                     | 10                                   | 2:49 AM                              | 37,800                      | 6                           |
| WV    | 7,000                                 | 17,100                                | 4                                     | 9                                    | 3:07 AM                              | 10,200                      | 6                           |
| WY    | 1,820                                 | 4,417                                 | 3                                     | 8                                    | 2:49 AM                              | 2,510                       | 4                           |
